# Supplementary material
Source: HighWire-hosted journal article supplement (http://www.jrheum.org/highwire/filestream/32729/field_highwire_adjunct_files/0/170233_Data_Suppl.pdf)

**Supplementary Figure 1.** Confirmatory factor analysis testing the theoretical construct underlying the Effort-Reward Imbalance questionnaire in the control group (A), patients with rheumatoid arthritis (B), and patients with systemic lupus erythematosus (C).

A.

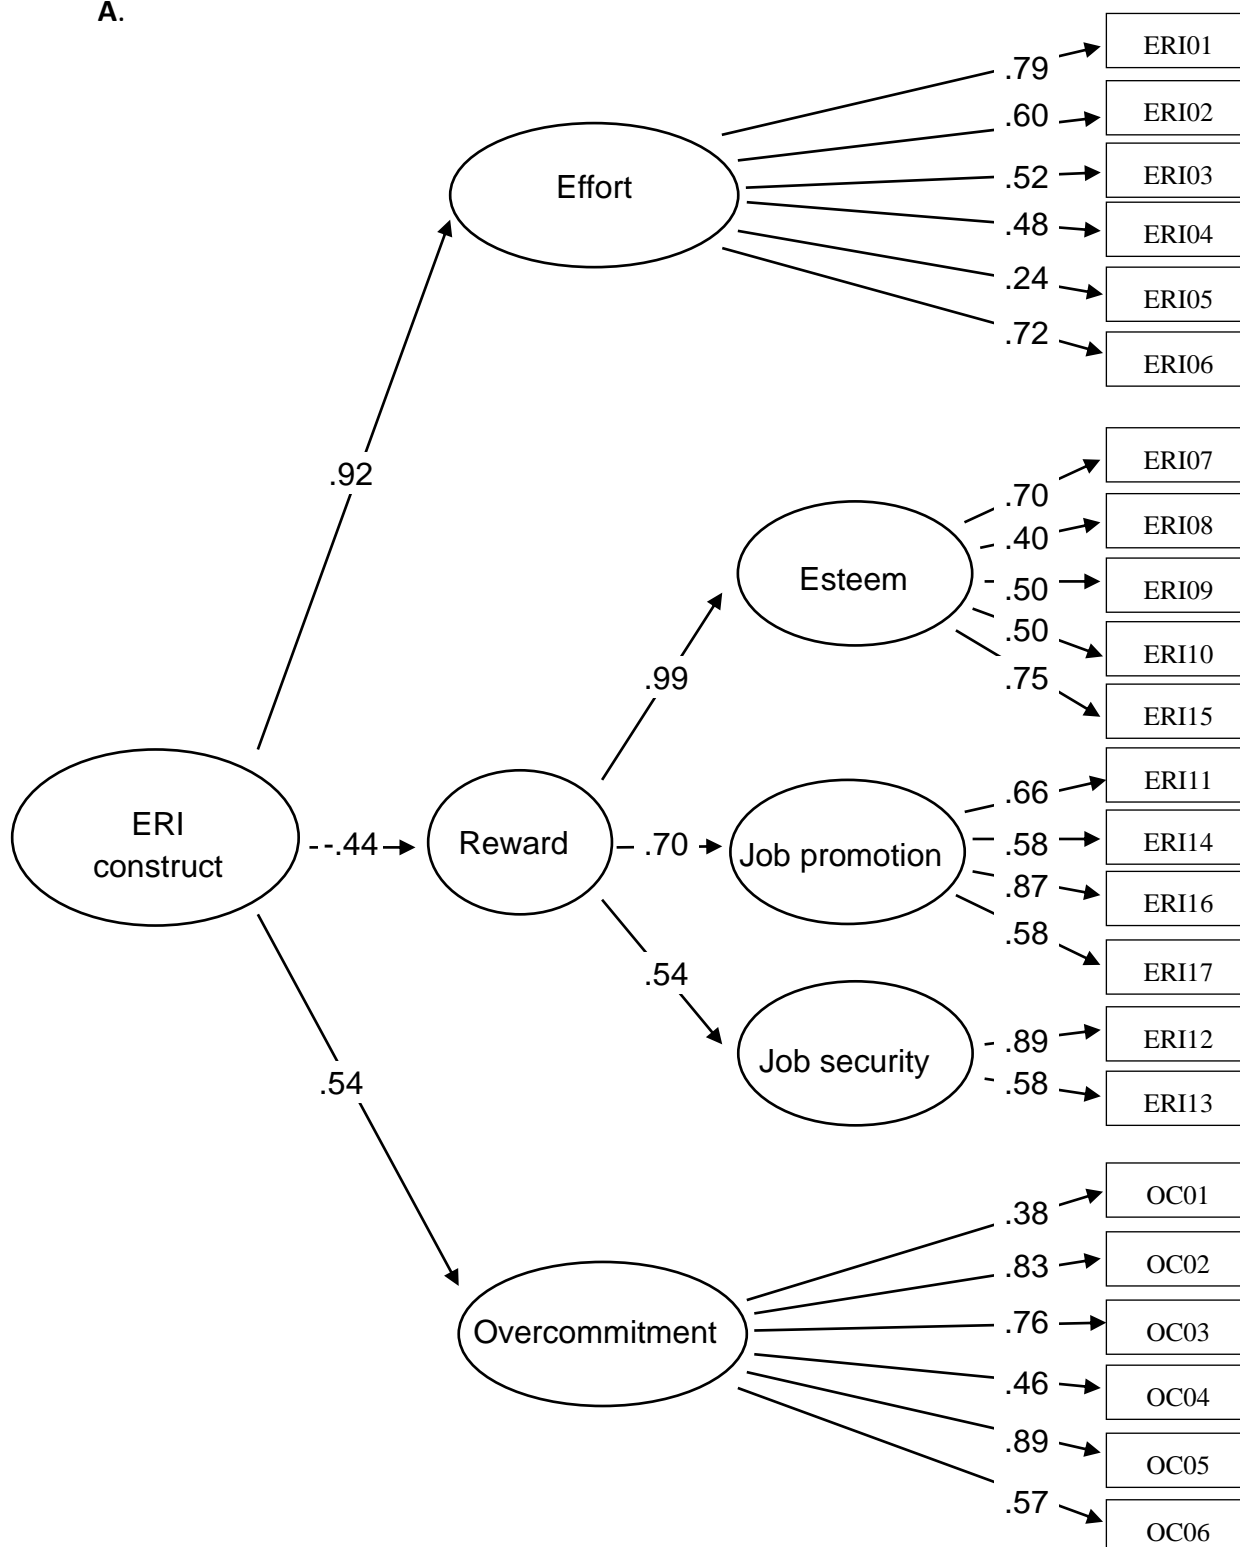

**B.**

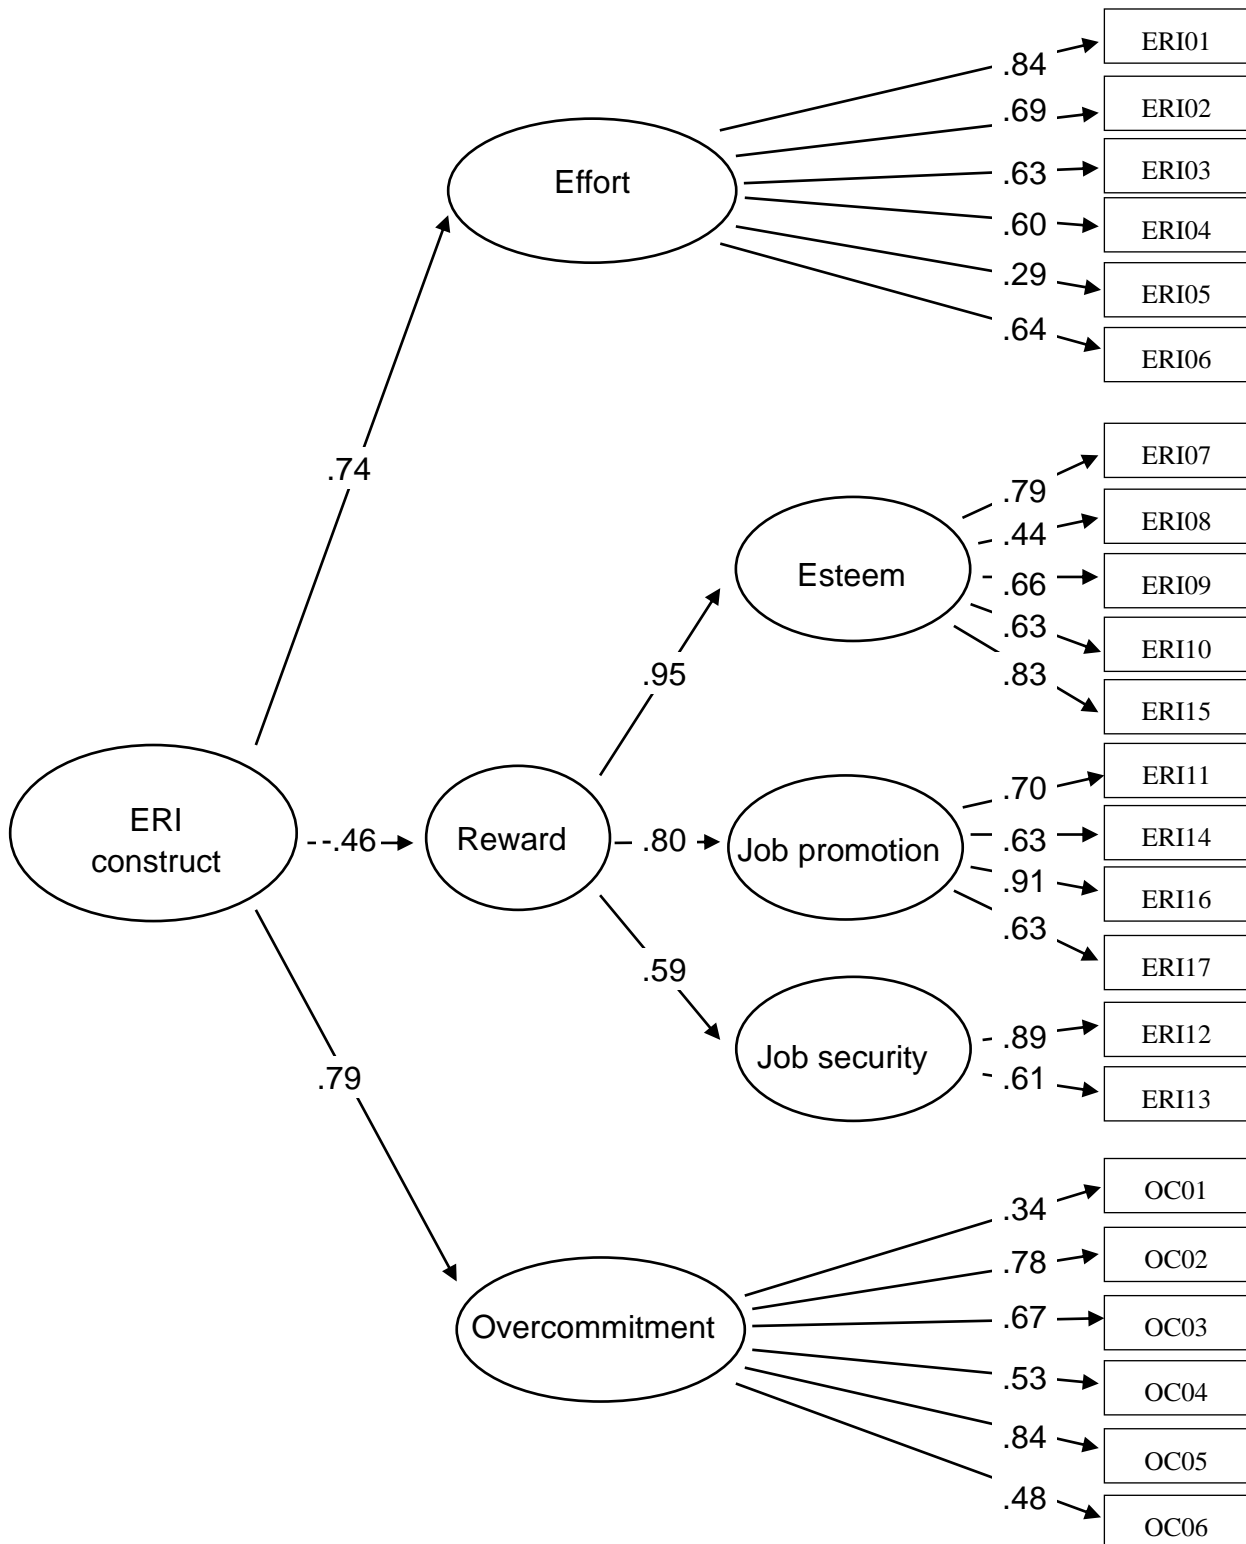

C.

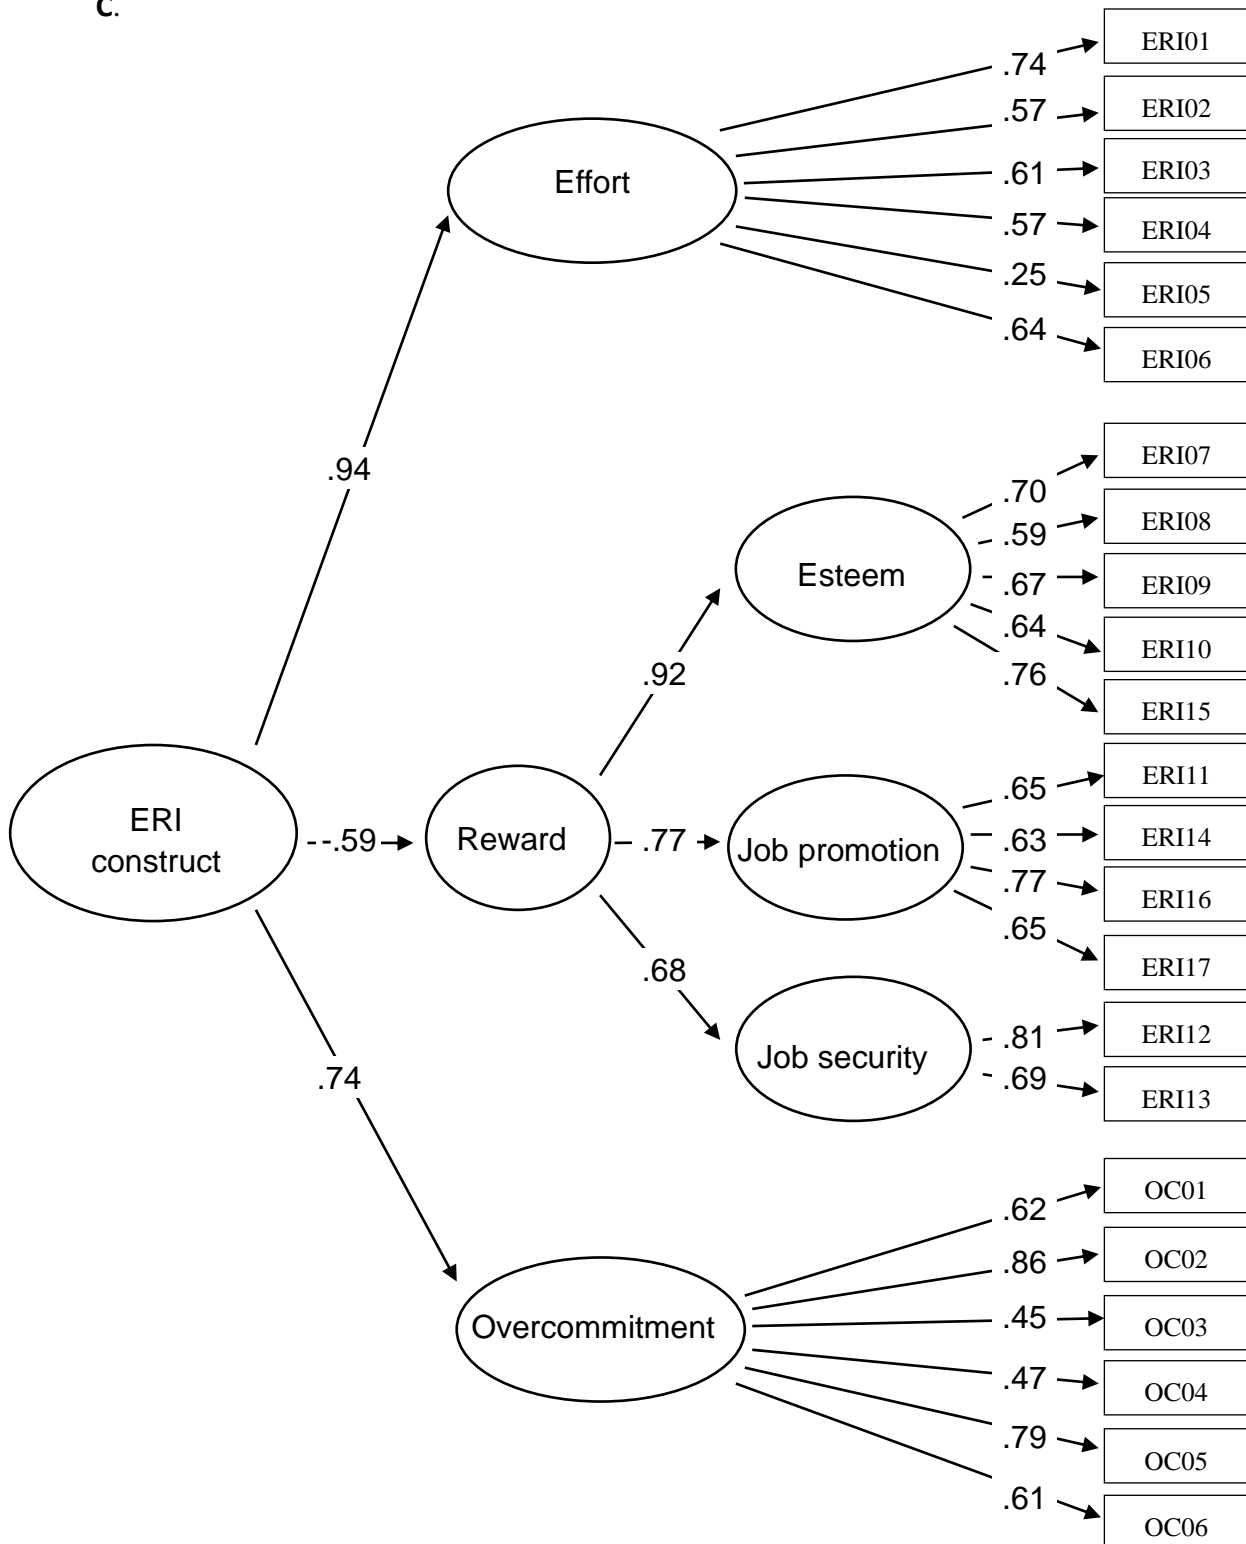

Supplement: 170233_Data_Suppl.pdf [file 170233_Data_Suppl.pdf]
